# Supplementary material
Source: Springer Nature journal article supplement (https://www.springermedizin.de/resource/supplementary/12990_2010_365_MOESM1_ESM.pdf/9613276)

# (A) MK-801

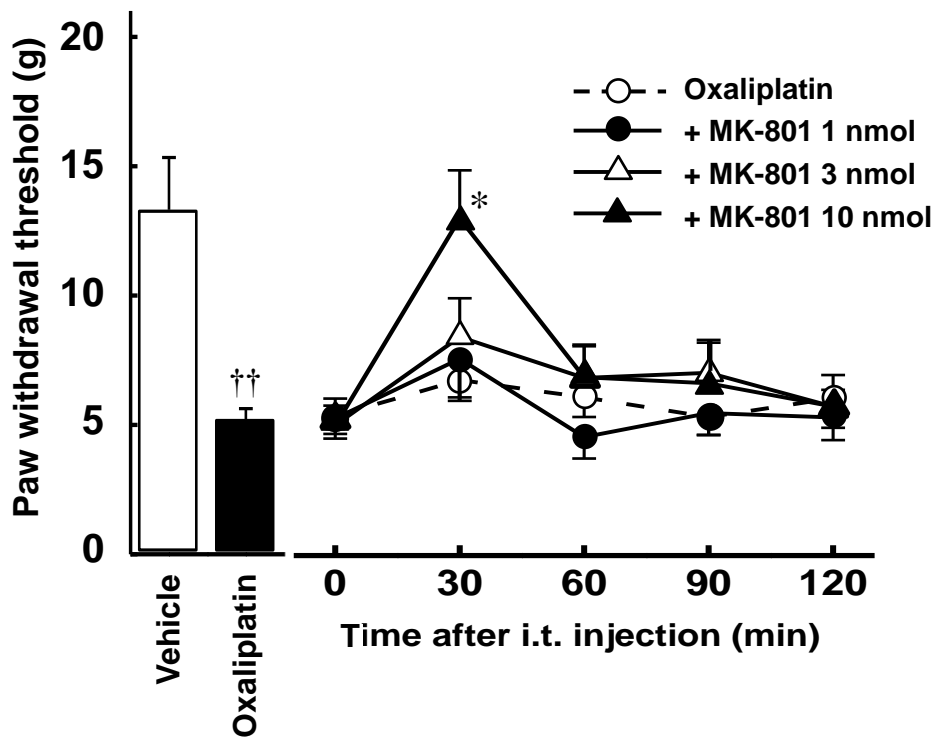

# (B) Memantine

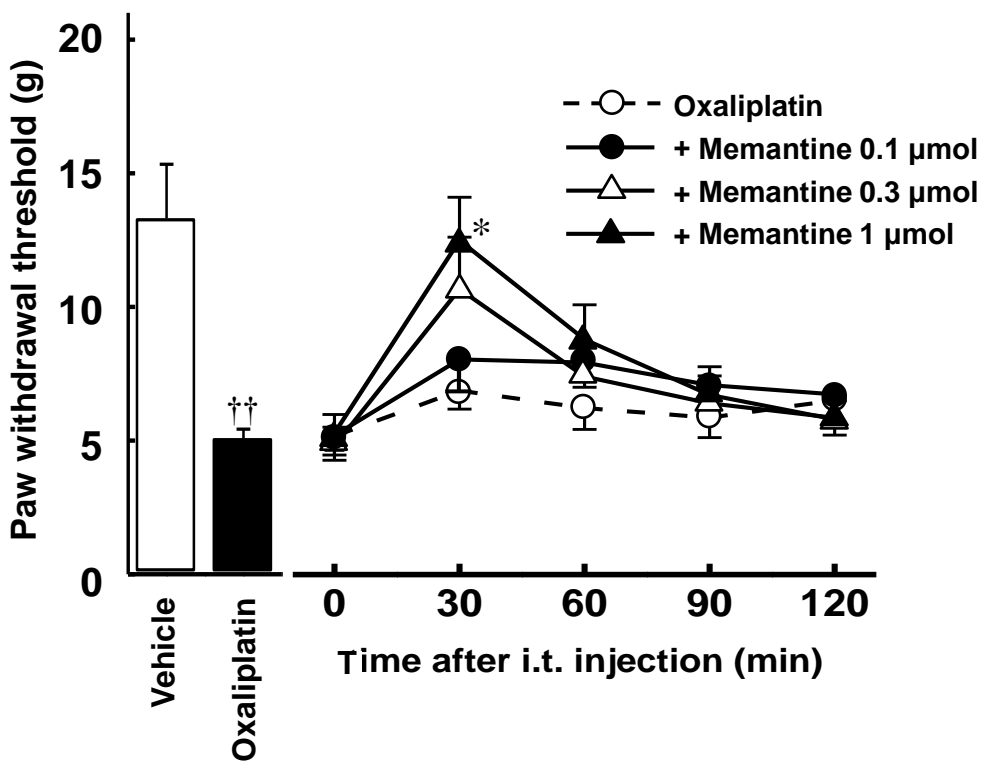

Supplement: MOESM1 [file 9613276]
